# Supplementary material for: Targeting Signaling Pathway Downstream of RIG-I/MAVS in the CNS Stimulates Production of Endogenous Type I IFN and Suppresses EAE
Source: MDPI journal article supplement (doi:10.3390/ijms231911292), 2022-09-25
Supplement: s1 [file s1]

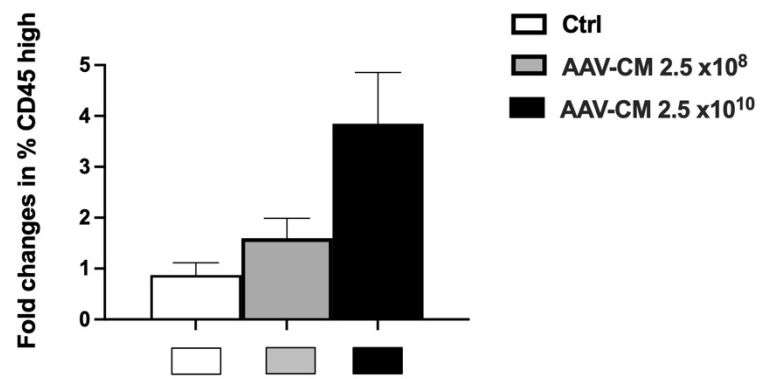

**Figure S1.** Intrathecal AAV-CM treatment induced CD45<sup>high</sup> infiltration in a dose-dependent manner.
